# Supplementary material for: Effects of Oak Leaf Extract, Biofertilizer, and Soil Containing Oak Leaf Powder on Tomato Growth and Biochemical Characteristics under Water Stress Conditions
Source: MDPI journal article supplement (doi:10.3390/agriculture12122082), 2022-12-04
Supplement: s1 [file s1]

**Table S1.** F and probability (P) values of different morpho-physiological traits of tomato genotypes treated with different treatments under the first, second, and their combinations of stress stages.

| First Stress Stage             |                    |          |          |                    |                    |                    |                    |                    |                    |
|--------------------------------|--------------------|----------|----------|--------------------|--------------------|--------------------|--------------------|--------------------|--------------------|
| Source of Variance             | SL                 | SFW      | SDW      | RL                 | RFW                | RDW                | FWT                | RWC                | TCC                |
| Treatments                     | 4.76**             | 43.70**  | 79.20**  | 9.85**             | 6.07**             | 2.91*              | 3.72*              | 4.53**             | 11.32**            |
| P-value                        | 0.01               | < 0.0001 | < 0.0001 | < 0.0001           | 0.00               | 0.05               | 0.02               | 0.01               | < 0.0001           |
| Genotypes                      | 6.92**             | 11.72**  | 30.08**  | 12.52**            | 2.78 <sup>NS</sup> | 3.28**             | 19.19**            | 3.11**             | 7.30**             |
| P-value                        | 0.00               | < 0.0001 | < 0.0001 | < 0.0001           | 0.06               | 0.03               | < 0.0001           | 0.04               | 0.00               |
| Treatments*Genotypes           | 1.44 <sup>NS</sup> | 19.50**  | 38.10**  | 1.65 <sup>NS</sup> | 2.98**             | 1.09 <sup>NS</sup> | 0.85 <sup>NS</sup> | 0.73 <sup>NS</sup> | 0.96 <sup>NS</sup> |
| P-value                        | 0.21               | < 0.0001 | < 0.0001 | 0.14               | 0.01               | 0.40               | 0.58               | 0.68               | 0.49               |
| Second Stress Stage            |                    |          |          |                    |                    |                    |                    |                    |                    |
| Source of Variance             | SL                 | SFW      | SDW      | RL                 | RFW                | RDW                | FWT                | RWC                | TCC                |
| Treatments                     | 15.74**            | 53.10**  | 61.47**  | 16.85**            | 9.94**             | 26.95**            | 8.98**             | 6.36**             | 25.84**            |
| P-value                        | < 0.0001           | < 0.0001 | < 0.0001 | < 0.0001           | < 0.0001           | < 0.0001           | 0.00               | 0.00               | < 0.0001           |
| Genotypes                      | 12.15**            | 69.13**  | 30.85**  | 8.53**             | 19.88**            | 50.93**            | 70.95**            | 1.97 <sup>NS</sup> | 59.07**            |
| P-value                        | < 0.0001           | < 0.0001 | < 0.0001 | 0.00               | < 0.0001           | < 0.0001           | < 0.0001           | 0.14               | < 0.0001           |
| Treatments*Genotypes           | 1.68 <sup>NS</sup> | 15.89**  | 18.76**  | 1.71 <sup>NS</sup> | 2.61*              | 5.48**             | 1.10 <sup>NS</sup> | 0.95 <sup>NS</sup> | 1.10 <sup>NS</sup> |
| P-value                        | 0.13               | < 0.0001 | < 0.0001 | 0.13               | 0.02               | 0.00               | 0.39               | 0.50               | 0.39               |
| First and Second Stress Stages |                    |          |          |                    |                    |                    |                    |                    |                    |
| Source of Variance             | SL                 | SFW      | SDW      | RL                 | RFW                | RDW                | FWT                | RWC                | TCC                |
| Treatments                     | 9.86**             | 55.28**  | 62.95**  | 11.38**            | 10.03**            | 29.28**            | 3.80*              | 4.91**             | 30.17**            |
| P-value                        | < 0.0001           | < 0.0001 | < 0.0001 | < 0.0001           | < 0.0001           | < 0.0001           | 0.02               | 0.01               | < 0.0001           |
| Genotypes                      | 31.68**            | 54.87**  | 82.20**  | 8.44**             | 34.91**            | 367.94**           | 116.56**           | 6.65**             | 47.73**            |
| P-value                        | < 0.0001           | < 0.0001 | < 0.0001 | 0.00               | < 0.0001           | < 0.0001           | < 0.0001           | 0.00               | < 0.0001           |
| Treatments*Genotypes           | 0.39 <sup>NS</sup> | 20.42**  | 17.17**  | 2.34*              | 2.17 <sup>NS</sup> | 3.64**             | 0.53 <sup>NS</sup> | 0.43 <sup>NS</sup> | 2.40*              |
| P-value                        | 0.93               | < 0.0001 | < 0.0001 | 0.04               | 0.05               | 0.00               | 0.84               | 0.91               | 0.03               |

SL: shoot length, SFW: shoot fresh weight, SDW: shoot dry weight, RL: root length, RFW: root fresh weight, RDW: root dry weight, FWT: fruits weight per plant, RWC: relative water content, TCC: total chlorophyll content. \*: indicates a significant difference between means at  $p \leq 0.05$ , \*\*: indicates a high significant difference between means at  $p \leq 0.01$ .

**Table S2.** F and probability (P) values of different fruit physicochemical characters of tomato genotypes treated with various treatments under the first, second, and their combinations of stress stages.

| First Stress Stage                |          |          |          |           |           |           |            |
|-----------------------------------|----------|----------|----------|-----------|-----------|-----------|------------|
| Source of Variance                | MC       | TA       | TSS      | ASC       | CAC       | SSC       | TPC        |
| Treatments                        | 35.01**  | 11.28**  | 14.83**  | 703.28**  | 408.90**  | 366.74**  | 63.39**    |
| P-value                           | < 0.0001 | < 0.0001 | < 0.0001 | < 0.0001  | < 0.0001  | < 0.0001  | < 0.0001   |
| Genotypes                         | 107.10** | 11.73**  | 47.76**  | 2011.86** | 2321.63** | 1252.07** | 1497.82**  |
| P-value                           | < 0.0001 | < 0.0001 | < 0.0001 | < 0.0001  | < 0.0001  | < 0.0001  | < 0.0001   |
| Treatments*Genotypes              | 6.90**   | 1.42NS   | 0.32NS   | 30.43**   | 54.16**   | 30.02**   | 3.00**     |
| P-value                           | < 0.0001 | 0.22     | 0.96     | < 0.0001  | < 0.0001  | < 0.0001  | 0.01       |
| Second Stress Stage               |          |          |          |           |           |           |            |
| Source of Variance                | MC       | TA       | TSS      | ASC       | CAC       | SSC       | TPC        |
| Treatments                        | 56.75**  | 11.04**  | 25.19**  | 370.75**  | 373.74**  | 350.57**  | 123.03**   |
| P-value                           | < 0.0001 | < 0.0001 | < 0.0001 | < 0.0001  | < 0.0001  | < 0.0001  | < 0.0001   |
| Genotypes                         | 189.83** | 29.37**  | 92.68**  | 2128.65** | 2535.35** | 2012.80** | 2055.33**  |
| P-value                           | < 0.0001 | < 0.0001 | < 0.0001 | < 0.0001  | < 0.0001  | < 0.0001  | < 0.0001   |
| Treatments*Genotypes              | 7.90**   | 1.46NS   | 2.70*    | 56.31**   | 122.29**  | 26.09**   | 30.22**    |
| P-value                           | < 0.0001 | 0.21     | 0.02     | < 0.0001  | < 0.0001  | < 0.0001  | < 0.0001   |
| Combination of Both Stress Satges |          |          |          |           |           |           |            |
| Source of Variance                | MC       | TA       | TSS      | ASC       | CAC       | SSC       | TPC        |
| Treatments                        | 23.81**  | 18.07**  | 16.56**  | 884.56**  | 302.99**  | 420.45**  | 1098.32**  |
| P-value                           | < 0.0001 | < 0.0001 | < 0.0001 | < 0.0001  | < 0.0001  | < 0.0001  | < 0.0001   |
| Genotypes                         | 136.52** | 21.32**  | 100.32** | 4596.29** | 4073.50** | 2281.65** | 14483.72** |
| P-value                           | < 0.0001 | < 0.0001 | < 0.0001 | < 0.0001  | < 0.0001  | < 0.0001  | < 0.0001   |
| Treatments*Genotypes              | 3.64**   | 2.19*    | 1.27NS   | 33.07**   | 10.60**   | 25.59**   | 143.15**   |
| P-value                           | 0.00     | 0.05     | 0.29     | < 0.0001  | < 0.0001  | < 0.0001  | < 0.0001   |

MC: moisture content, TA: titratable acidity, TSS: total soluble solids, ASC: ascorbic acid content, CAC: carotenoid content, SSC: soluble sugar content, TPC: total phenolics content. \*: indicates a significant difference between means at  $p \leq 0.05$ , \*\*: indicates a high significant difference between means at  $p \leq 0.01$ .

**Table S3.** F and probability (P) values of different leaf biochemical parameters of tomato genotypes treated with different treatments under the first, second, and their combinations of stress stages.

| First Stress Stage             |            |            |            |            |            |          |          |
|--------------------------------|------------|------------|------------|------------|------------|----------|----------|
| Source of Variance             | PC         | SSC        | TPC        | AC         | LP         | GPA      | CAT      |
| Treatments                     | 31966.36** | 39605.53** | 11958.11** | 53098.30** | 18480.69** | 251.12** | 320.44** |
| P-value                        | < 0.0001   | < 0.0001   | < 0.0001   | < 0.0001   | < 0.0001   | < 0.0001 | < 0.0001 |
| Genotypes                      | 10566.22** | 33105.60** | 4237.44**  | 5920.08**  | 62346.79** | 355.11** | 157.03** |
| P-value                        | < 0.0001   | < 0.0001   | < 0.0001   | < 0.0001   | < 0.0001   | < 0.0001 | < 0.0001 |
| Treatments*Genotypes           | 1815.71**  | 2843.97**  | 452.05**   | 2171.94**  | 1754.92**  | 30.08**  | 22.25**  |
| P-value                        | < 0.0001   | < 0.0001   | < 0.0001   | < 0.0001   | < 0.0001   | < 0.0001 | < 0.0001 |
| Second Stress Stage            |            |            |            |            |            |          |          |
| Source of Variance             | PC         | SSC        | TPC        | AC         | LP         | GPA      | CAT      |
| Treatments                     | 15850.70** | 47126.03** | 15571.56** | 79411.52** | 18884.81** | 279.43** | 34.32**  |
| P-value                        | < 0.0001   | < 0.0001   | < 0.0001   | < 0.0001   | < 0.0001   | < 0.0001 | < 0.0001 |
| Genotypes                      | 35763.27** | 35982.92** | 19349.94** | 5099.76**  | 28809.89** | 262.22** | 208.11** |
| P-value                        | < 0.0001   | < 0.0001   | < 0.0001   | < 0.0001   | < 0.0001   | < 0.0001 | < 0.0001 |
| Treatments*Genotypes           | 6154.66**  | 1921.53**  | 2480.37**  | 742.48**   | 2091.72**  | 40.38**  | 45.90**  |
| P-value                        | < 0.0001   | < 0.0001   | < 0.0001   | < 0.0001   | < 0.0001   | < 0.0001 | < 0.0001 |
| First and Second Stress Stages |            |            |            |            |            |          |          |
| Source of Variance             | PC         | SSC        | TPC        | AC         | LP         | GPA      | CAT      |
| Treatments                     | 10306.96** | 56106.32** | 50623.60** | 106.71**   | 22634.00** | 485.11** | 114.97** |
| P-value                        | < 0.0001   | < 0.0001   | < 0.0001   | < 0.0001   | < 0.0001   | < 0.0001 | < 0.0001 |
| Genotypes                      | 14059.03** | 67059.11** | 53061.03** | 65.18**    | 42720.43** | 482.82** | 336.13** |
| P-value                        | < 0.0001   | < 0.0001   | < 0.0001   | < 0.0001   | < 0.0001   | < 0.0001 | < 0.0001 |
| Treatments*Genotypes           | 2567.11**  | 4522.36**  | 7761.97**  | 10.78**    | 2312.75**  | 73.48**  | 77.51**  |
| P-value                        | < 0.0001   | < 0.0001   | < 0.0001   | < 0.0001   | < 0.0001   | < 0.0001 | < 0.0001 |

PC: proline content, SSC: soluble sugar content, TPC: total phenolic content, AC: antioxidant activity, LP: lipid peroxidation, GPA: peroxidase, CAT: catalase \*: indicates a significant difference between means at  $p \leq 0.05$ , \*\*: indicates a high significant difference between means at  $p \leq 0.01$ .

**Table S4.** Interaction effects of tomato genotypes and treatments on the different morpho-physiological characters under the first, second, and their combinations of stress stages.

| Increasing and Decreasing Percentages Compared to Irrigated Plants during the First Stress Stage |                  |                |                |                |                  |                 |                  |                 |                   |
|--------------------------------------------------------------------------------------------------|------------------|----------------|----------------|----------------|------------------|-----------------|------------------|-----------------|-------------------|
| Interaction                                                                                      | SL (%)           | SFW (%)        | SDW (%)        | RL (%)         | RFW (%)          | RDW (%)         | FWT (%)          | RWC (%)         | TCC (%)           |
| SOBS*Braw                                                                                        | -7.72 abc ± 5.03 | 33.35 a ± 5.30 | 51.30 a ± 2.14 | -5.10 d ± 5.27 | 145.06 a ± 25.28 | 72.92 b ± 21.52 | -26.50 bc ± 8.17 | -9.69 ab ± 0.88 | -12.10 abc ± 4.09 |

|                   |                   |                   |                   |                   |                   |                  |                   |                   |                   |
|-------------------|-------------------|-------------------|-------------------|-------------------|-------------------|------------------|-------------------|-------------------|-------------------|
| SOBS*Yadgar       | -11.95 bcd ± 4.46 | -19.80 de ± 7.43  | -15.79 e-h ± 6.74 | 27.17 a ± 15.91   | 38.29 b-e ± 3.33  | 23.96 b ± 3.61   | -38.39 cde ± 5.58 | -15.21 bc ± 2.49  | -13.98 a-d ± 3.37 |
| SOBS*Raza Pashayi | -3.78 ab ± 1.04   | -5.01 bc ± 0.84   | -2.56 bc ± 0.34   | 1.56 bcd ± 12.01  | 46.79 b-e ± 16.52 | 70.78 b ± 12.73  | -17.71 ab ± 8.15  | -11.67 abc ± 3.06 | -32.86 cde ± 1.35 |
| SOBS*Sandra       | -3.34 ab ± 5.19   | -0.94 b ± 4.63    | -2.08 bc ± 8.51   | -3.89 cd ± 7.73   | 69.58 bc ± 52.19  | 229.16 a ± 54.31 | -26.61 bc ± 3.33  | -11.22 abc ± 4.19 | -38.28 e ± 0.66   |
| SOES*Braw         | -16.22 cd ± 6.91  | -8.19 bc ± 12.56  | 3.83 b ± 2.76     | -8.54 d ± 2.63    | 88.46 ab ± 20.52  | 33.26 b ± 21.90  | -22.77 bc ± 3.75  | -12.47 bc ± 6.69  | -7.73 ab ± 4.08   |
| SOES*Yadgar       | -6.78 abc ± 6.89  | -8.63 bc ± 5.03   | -12.16 d-g ± 5.37 | 15.68 ab ± 5.71   | 61.03 bcd ± 4.26  | 32.73 b ± 2.88   | -38.54 cde ± 4.42 | -12.96 bc ± 0.57  | -2.93 a ± 7.34    |
| SOES*Raza Pashayi | 0.14 a ± 5.73     | -3.33 b ± 1.42    | -1.99 bc ± 0.16   | -7.05 d ± 12.13   | 23.93 b-e ± 21.01 | 46.89 b ± 22.06  | -17.74 ab ± 8.36  | -9.75 ab ± 6.19   | -22.67 a-e ± 9.70 |
| SOES*Sandra       | -3.31 ab ± 6.60   | -2.97 b ± 9.52    | -2.65 bc ± 12.45  | 0.04 bcd ± 10.47  | 2.57 cde ± 107.38 | 62.17 b ± 272.95 | -6.40 a ± 26.08   | -2.57 a ± 13.08   | -5.86 a ± 37.48   |
| SOS*Braw          | -4.86 ab ± 4.91   | -2.78 b ± 9.22    | -7.80 c-f ± 5.09  | -14.81 de ± 16.97 | 43.05 b-e ± 41.38 | 19.84 b ± 29.07  | -27.09 bc ± 5.30  | -16.27 bc ± 0.35  | -27.44 b-e ± 3.12 |
| SOS*Yadgar        | -13.37 bcd ± 5.67 | -14.82 cd ± 3.12  | -18.62 gh ± 4.58  | 13.89 abc ± 12.73 | 16.37 cde ± 1.11  | 9.27 b ± 1.84    | -43.21 de ± 3.86  | -15.82 bc ± 1.94  | -28.54 b-e ± 7.53 |
| SOS*Raza Pashayi  | -5.65 ab ± 4.08   | -6.04 bc ± 1.26   | -4.01 bcd ± 1.14  | -9.29 d ± 9.10    | 41.18 b-e ± 15.21 | 46.21 b ± 11.32  | -19.23 ab ± 3.65  | -12.25 bc ± 4.49  | -34.35 de ± 6.12  |
| SOS*Sandra        | -4.65 ab ± 4.04   | -12.08 bcd ± 1.30 | -15.70 e-h ± 3.20 | -8.06 d ± 8.77    | 19.59 b-e ± 31.40 | 14.70 b ± 12.60  | -24.83 bc ± 4.95  | -12.63 bc ± 6.29  | -43.02 e ± 7.64   |
| SS*Braw           | -13.78 bcd ± 4.44 | -45.71 f ± 5.77   | -44.18 i ± 3.89   | -30.73 e ± 6.42   | -11.39 e ± 10.37  | -27.64 b ± 9.78  | -29.54 bcd ± 1.28 | -20.80 c ± 1.71   | -23.13 a-e ± 5.71 |
| SS*Yadgar         | -20.40 d ± 5.72   | -28.56 e ± 6.27   | -24.75 h ± 1.87   | -15.83 de ± 8.04  | -2.49 de ± 6.04   | -7.26 b ± 10.75  | -50.38 e ± 2.45   | -18.72 bc ± 3.76  | -22.48 a-e ± 6.07 |
| SS*Raza Pashayi   | -10.63 bcd ± 3.22 | -8.63 bc ± 0.44   | -6.60 cde ± 0.68  | -11.31 d ± 12.20  | 24.87 b-e ± 14.63 | 51.16 b ± 6.83   | -23.17 bc ± 7.00  | -13.33 bc ± 6.32  | -36.25 e ± 9.34   |
| SS*Sandra         | -9.27 abc ± 7.93  | -16.13 cd ± 0.34  | -16.41 fgh ± 4.16 | -8.82 d ± 4.87    | 53.64 b-e ± 25.41 | 88.18 b ± 48.03  | -27.21 bc ± 3.98  | -14.13 bc ± 2.37  | -43.32 e ± 2.26   |

**Increasing and Decreasing Percentages Compared to Irrigated Plants during the Second Stress Stage**

| Interaction       | SL (%)            | SFW (%)          | SDW (%)           | RL (%)             | RFW (%)           | RDW (%)           | FWT (%)           | RWC (%)           | TCC (%)           |
|-------------------|-------------------|------------------|-------------------|--------------------|-------------------|-------------------|-------------------|-------------------|-------------------|
| SOBS*Braw         | -8.74 ab ± 4.03   | 5.03 a ± 1.10    | 29.64 a ± 4.10    | 14.76 abc ± 21.54  | 258.68 a ± 86.01  | 115.49 b ± 40.91  | -34.32 d-g ± 2.46 | -13.43 abc ± 3.58 | -8.39 a ± 6.24    |
| SOBS*Yadgar       | -14.41 abc ± 4.33 | -27.54 de ± 9.14 | -17.98 efg ± 6.21 | 34.71 a ± 11.55    | 12.39 b ± 10.51   | 12.78 efg ± 6.61  | -42.56 gh ± 4.28  | -6.89 ab ± 3.93   | -19.93 bc ± 0.48  |
| SOBS*Raza Pashayi | -7.66 ab ± 4.62   | -5.64 b ± 0.77   | -3.51 bcd ± 0.81  | 15.16 abc ± 2.69   | 80.38 b ± 19.62   | 107.95 bc ± 11.28 | -8.52 a ± 4.79    | -10.60 abc ± 3.87 | -33.10 ef ± 0.99  |
| SOBS*Sandra       | -6.30 a ± 1.20    | -3.64 b ± 4.92   | 3.95 bc ± 6.44    | -1.83 b-h ± 7.30   | 78.84 b ± 48.05   | 250.96 a ± 24.06  | -28.55 cde ± 1.64 | -9.55 abc ± 6.31  | -35.32 f ± 7.43   |
| SOES*Braw         | -13.46 abc ± 4.66 | -14.97 c ± 7.06  | 5.44 b ± 12.34    | 3.05 b-f ± 27.47   | 207.79 a ± 110.12 | 93.08 bc ± 47.42  | -35.47 efg ± 2.00 | -12.31 abc ± 1.87 | -3.06 a ± 1.98    |
| SOES*Yadgar       | -10.26 ab ± 5.59  | -27.58 de ± 7.79 | -18.51 efg ± 5.25 | 19.99 ab ± 2.89    | 48.89 b ± 8.31    | 20.33 efg ± 4.67  | -42.60 gh ± 6.38  | -7.71 abc ± 2.82  | -11.01 ab ± 7.62  |
| SOES*Raza Pashayi | -5.23 a ± 5.22    | -4.29 b ± 0.61   | -3.14 bcd ± 0.21  | 6.69 b-e ± 10.25   | 45.98 b ± 16.61   | 83.95 bcd ± 11.02 | -17.88 b ± 8.27   | -10.37 abc ± 6.93 | -22.06 cd ± 10.27 |
| SOES*Sandra       | -7.22 ab ± 4.23   | -9.81 bc ± 1.02  | -4.52 cd ± 7.40   | -5.87 c-h ± 2.56   | 76.65 b ± 50.07   | 220.78 a ± 55.61  | -26.32 bcd ± 5.82 | -5.07 a ± 14.10   | -31.27 def ± 1.25 |
| SOS*Braw          | -20.98 cd ± 6.84  | -27.28 de ± 2.57 | -15.64 ef ± 3.26  | -18.92 fgh ± 2.20  | 82.29 b ± 38.86   | 33.94 def ± 25.56 | -37.08 efg ± 4.68 | -13.72 abc ± 1.48 | -25.70 cde ± 1.09 |
| SOS*Yadgar        | -13.54 abc ± 5.36 | -31.21 de ± 2.79 | -25.57 gh ± 4.90  | 9.36 bcd ± 11.04   | 6.85 b ± 4.58     | 2.47 efg ± 4.00   | -48.30 hi ± 5.96  | -8.46 abc ± 1.35  | -25.45 cde ± 5.53 |
| SOS*Raza Pashayi  | -9.98 ab ± 1.76   | -6.93 b ± 1.01   | -5.11 cd ± 0.15   | -12.51 d-h ± 10.85 | 28.46 b ± 14.42   | 56.73 cde ± 9.40  | -22.84 bc ± 2.65  | -11.56 abc ± 2.25 | -33.88 ef ± 4.07  |
| SOS*Sandra        | -7.52 ab ± 2.94   | -15.40 c ± 3.74  | -9.78 de ± 5.61   | -23.79 h ± 4.23    | 4.55 b ± 32.02    | 53.25 cde ± 17.45 | -32.29 def ± 3.23 | -9.79 abc ± 7.42  | -48.11 g ± 5.57   |
| SS*Braw           | -30.57 e ± 5.33   | -49.66 f ± 2.15  | -43.62 i ± 1.62   | -1.06 b-g ± 12.73  | 51.76 b ± 42.66   | -32.60 g ± 10.65  | -39.78 fgh ± 3.14 | -18.73 cd ± 6.22  | -19.36 bc ± 5.50  |
| SS*Yadgar         | -23.35 de ± 5.48  | -33.69 e ± 4.19  | -29.83 h ± 6.10   | -14.63 e-h ± 4.59  | -5.86 b ± 2.05    | -7.60 fg ± 4.47   | -52.96 i ± 5.06   | -24.78 d ± 5.65   | -26.21 c-f ± 2.37 |
| SS*Raza Pashayi   | -11.99 ab ± 4.25  | -8.44 bc ± 1.49  | -5.53 cd ± 0.77   | -21.21 gh ± 9.71   | 19.24 b ± 12.39   | 56.20 cde ± 7.79  | -25.51 bcd ± 7.24 | -17.73 bcd ± 1.37 | -35.74 f ± 6.29   |
| SS*Sandra         | -16.35 bcd ± 5.75 | -24.43 d ± 3.82  | -21.58 fgh ± 4.14 | -14.46 e-h ± 10.90 | 53.23 b ± 56.56   | 109.93 bc ± 78.01 | -32.30 def ± 3.63 | -11.32 abc ± 6.96 | -44.89 g ± 1.40   |

**Increasing and Decreasing Percentages Compared to Irrigated Plants during the First and Second Stress Stages**

| Interaction       | SL (%)            | SFW (%)           | SDW (%)          | RL (%)             | RFW (%)           | RDW (%)           | FWT (%)           | RWC (%)           | TCC (%)           |
|-------------------|-------------------|-------------------|------------------|--------------------|-------------------|-------------------|-------------------|-------------------|-------------------|
| SOBS*Braw         | -22.92 efg ± 5.08 | -22.78 de ± 10.23 | -17.85 de ± 8.40 | 7.41 bc ± 12.83    | 211.14 a ± 47.76  | 62.51 cd ± 34.00  | -45.21 ef ± 2.50  | -16.13 a-e ± 2.82 | -17.46 cd ± 3.38  |
| SOBS*Yadgar       | -16.94 b-e ± 6.40 | -27.66 ef ± 7.42  | -20.16 e ± 3.84  | 25.04 a ± 13.47    | 8.59 ef ± 8.14    | -0.28 fgh ± 7.50  | -59.76 hi ± 1.94  | -10.00 ab ± 9.03  | -14.27 bc ± 2.35  |
| SOBS*Raza Pashayi | -9.09 abc ± 2.77  | -5.47 abc ± 0.56  | -1.88 ab ± 0.39  | 15.31 ab ± 7.74    | 62.86 b-e ± 13.78 | 87.93 c ± 7.55    | -25.01 a ± 5.38   | -22.24 cde ± 2.66 | -35.04 fg ± 5.18  |
| SOBS*Sandra       | -6.87 a ± 5.34    | -4.97 abc ± 5.20  | 2.74 a ± 6.77    | -13.68 ef ± 6.62   | 85.49 bc ± 50.95  | 255.70 a ± 21.58  | -34.42 bc ± 4.10  | -14.00 a-d ± 5.37 | -38.12 gh ± 5.54  |
| SOES*Braw         | -23.35 efg ± 3.48 | 2.18 a ± 6.72     | -2.94 ab ± 3.54  | 3.97 be ± 11.25    | 195.59 a ± 64.27  | 45.55 de ± 29.60  | -43.55 def ± 5.63 | -14.99 a-e ± 3.29 | -0.27 a ± 6.73    |
| SOES*Yadgar       | -17.96 c-f ± 5.31 | -27.16 ef ± 7.58  | -21.70 e ± 4.39  | 14.12 ab ± 17.65   | 34.56 c-f ± 4.78  | 22.87 efg ± 8.60  | -55.79 gh ± 5.33  | -6.96 a ± 5.27    | -6.84 ab ± 7.74   |
| SOES*Raza Pashayi | -7.86 ab ± 3.58   | -4.22 ab ± 0.68   | -2.04 ab ± 0.34  | 3.37 be ± 3.45     | 45.25 b-f ± 18.92 | 62.21 cd ± 17.13  | -23.23 a ± 4.83   | -19.65 b-e ± 2.06 | -25.28 def ± 7.78 |
| SOES*Sandra       | -9.09 abc ± 4.09  | -7.38 abc ± 2.78  | -7.60 bc ± 5.52  | -11.36 def ± 12.65 | 83.12 bcd ± 53.56 | 272.21 a ± 38.37  | -36.31 bcd ± 2.99 | -13.17 a-d ± 8.71 | -32.55 efg ± 1.27 |
| SOS*Braw          | -27.66 g ± 6.25   | -7.80 abc ± 8.38  | -6.84 bc ± 1.88  | -9.86 c-f ± 9.54   | 106.14 b ± 39.00  | -24.19 h ± 11.35  | -42.44 c-f ± 5.49 | -16.82 a-e ± 2.85 | -22.19 cd ± 2.57  |
| SOS*Yadgar        | -19.73 d-g ± 5.99 | -36.04 fg ± 6.17  | -29.50 f ± 3.35  | 5.78 bcd ± 8.31    | 0.68 ef ± 4.81    | -11.56 gh ± 3.12  | -54.41 gh ± 5.35  | -11.86 abc ± 7.60 | -33.27 fg ± 5.20  |
| SOS*Raza Pashayi  | -9.38 abc ± 4.62  | -6.89 abc ± 0.44  | -3.59 ab ± 0.15  | -4.24 c-f ± 1.58   | 20.77 c-f ± 7.15  | 34.06 def ± 4.49  | -25.91 a ± 4.16   | -22.30 cde ± 3.77 | -33.80 fg ± 6.36  |
| SOS*Sandra        | -13.22 a-d ± 5.10 | -15.17 cd ± 3.52  | -12.27 cd ± 1.61 | -6.58 c-f ± 8.83   | 79.53 bcd ± 49.64 | 251.92 a ± 36.87  | -37.40 cde ± 2.70 | -16.52 a-e ± 8.19 | -42.37 gh ± 1.70  |
| SS*Braw           | -36.26 h ± 6.49   | -69.46 h ± 3.47   | -47.50 g ± 4.32  | -20.51 f ± 3.60    | 59.41 b-e ± 7.41  | -34.67 h ± 4.95   | -48.13 fg ± 2.24  | -25.72 e ± 5.73   | -23.27 cde ± 6.46 |
| SS*Yadgar         | -26.52 fg ± 4.39  | -39.15 g ± 5.86   | -33.88 f ± 1.74  | -9.87 c-f ± 6.56   | -13.74 f ± 1.09   | -19.17 h ± 1.32   | -63.89 i ± 4.42   | -20.10 b-e ± 6.95 | -34.05 fg ± 5.61  |
| SS*Raza Pashayi   | -13.55 a-d ± 3.78 | -8.34 bc ± 0.52   | -5.63 bc ± 0.58  | -13.88 ef ± 4.25   | 17.61 def ± 17.95 | 28.07 def ± 13.03 | -29.44 ab ± 7.31  | -23.95 de ± 1.36  | -38.10 gh ± 7.17  |
| SS*Sandra         | -18.86 d-g ± 4.93 | -27.06 ef ± 1.21  | -22.94 e ± 1.94  | -7.66 c-f ± 7.05   | 45.02 b-f ± 43.32 | 174.23 b ± 16.90  | -38.95 cde ± 0.73 | -18.48 b-e ± 5.29 | -47.13 h ± 5.48   |

SL: shoot length, SFW: shoot fresh weight, SDW: shoot dry weight, RL: root length, RFW: root fresh weight, RDW: root dry weight, FWT: fruits weight per plant, RWC: relative water content, TCC: total chlorophyll content, SS: stressed plants, SOS: stressed plants + oak leaf powder, SOES: stressed plants + oak leaf powder + oak leaf extract, SOBS: stressed plants + oak leaf powder + biofertilizers. Duncan's multiple range test at  $p \leq 0.05$  indicates that any values sharing the same letter in the same column are not statistically significant. The trait index  $\pm$  standard deviation (SD) is used to denote the values.

**Table S5.** Interaction effects of tomato genotypes and treatments on the different physicochemical traits under the first, second, and their combinations of stress stages.

| Increasing and Decreasing Percentages Compared to Irrigated Plants during the First Stress Stage |        |        |         |         |         |         |         |
|--------------------------------------------------------------------------------------------------|--------|--------|---------|---------|---------|---------|---------|
| Interaction                                                                                      | MC (%) | TA (%) | TSS (%) | ASC (%) | CAC (%) | SSC (%) | TPC (%) |

|                   |                  |                 |                  |                |                 |                 |                 |
|-------------------|------------------|-----------------|------------------|----------------|-----------------|-----------------|-----------------|
| SOBS*Braw         | -1.12 fg ± 0.16  | 2.14 cd ± 2.14  | -4.92 e-h ± 2.42 | 5.44 i ± 1.08  | -6.34 i ± 0.81  | -3.60 f ± 0.38  | -10.48 h ± 4.00 |
| SOBS*Yadgar       | -1.03 f ± 0.23   | 4.72 cd ± 4.76  | -4.98 e-h ± 2.82 | 20.43 e ± 0.19 | -7.85 j ± 0.90  | -4.54 f ± 1.38  | 9.26 e ± 0.99   |
| SOBS*Raza Pashayi | -0.29 abc ± 0.08 | -2.85 de ± 9.01 | -0.53 bcd ± 2.53 | 32.65 b ± 1.00 | -0.21 e ± 0.21  | 9.99 b ± 0.57   | 20.90 ab ± 0.53 |
| SOBS*Sandra       | -0.23 ab ± 0.14  | 6.53 c ± 6.67   | 3.51 a ± 3.04    | 35.47 a ± 0.43 | 2.32 b ± 0.09   | 11.24 b ± 0.84  | 14.53 d ± 0.39  |
| SOES*Braw         | -0.87 def ± 0.33 | 4.23 cd ± 0.06  | -4.21 d-g ± 2.06 | 3.57 j ± 0.89  | -4.02 h ± 0.24  | -3.05 f ± 1.42  | -5.27 g ± 0.16  |
| SOES*Yadgar       | -0.90 ef ± 0.07  | 4.72 cd ± 4.76  | -5.61 fgh ± 1.82 | 15.17 f ± 0.17 | -7.19 j ± 0.56  | -7.06 g ± 1.95  | 9.84 e ± 0.48   |
| SOES*Raza Pashayi | -0.38 abc ± 0.11 | -9.16 e ± 3.31  | -1.09 b-e ± 1.89 | 36.58 a ± 0.80 | 0.84 d ± 0.42   | 7.59 c ± 0.13   | 22.43 a ± 0.25  |
| SOES*Sandra       | -0.22 a ± 0.15   | 4.31 cd ± 3.73  | 2.61 ab ± 0.04   | 33.09 b ± 1.71 | 3.18 a ± 0.08   | 13.62 a ± 1.14  | 17.39 c ± 0.27  |
| SOS*Braw          | -1.41 gh ± 0.18  | 6.45 c ± 6.49   | -7.74 ghi ± 1.18 | -0.85 k ± 0.18 | -8.67 k ± 0.16  | -8.10 g ± 0.14  | -6.74 g ± 0.35  |
| SOS*Yadgar        | -1.14 fg ± 0.08  | 9.31 abc ± 0.22 | -8.12 hi ± 0.99  | 12.40 g ± 1.97 | -13.18 l ± 0.08 | -12.82 h ± 1.15 | 8.53 e ± 0.61   |
| SOS*Raza Pashayi  | -0.54 abc ± 0.03 | 3.09 cd ± 3.13  | -2.75 c-f ± 2.51 | 28.02 c ± 0.95 | -1.46 f ± 0.62  | 4.49 d ± 0.17   | 19.83 b ± 0.35  |
| SOS*Sandra        | -0.39 abc ± 0.12 | 4.44 cd ± 7.70  | 0.90 abc ± 3.00  | 24.13 d ± 1.05 | 1.89 bc ± 0.52  | 7.05 c ± 0.43   | 14.63 d ± 0.46  |
| SS*Braw           | -2.46 i ± 0.43   | 17.00 a ± 0.33  | -9.86 i ± 1.17   | -7.14 l ± 1.10 | -13.95 m ± 0.09 | -23.04 j ± 0.30 | -11.23 h ± 0.06 |
| SS*Yadgar         | -1.47 h ± 0.12   | 16.32 ab ± 2.71 | -11.24 i ± 1.77  | 3.72 j ± 1.27  | -15.58 n ± 0.20 | -15.33 i ± 1.24 | 5.18 f ± 0.53   |
| SS*Raza Pashayi   | -0.61 cde ± 0.03 | 2.97 cd ± 2.94  | -3.87 d-g ± 1.88 | 19.91 e ± 0.65 | -2.51 g ± 0.40  | 0.85 e ± 0.07   | 16.11 cd ± 0.39 |
| SS*Sandra         | -0.56 bcd ± 0.07 | 8.61 bc ± 4.09  | -1.73 c-f ± 1.50 | 9.14 h ± 0.75  | 1.46 cd ± 0.43  | 4.39 d ± 1.36   | 10.16 e ± 0.24  |

**Increasing and Decreasing Percentages Compared to Irrigated Plants during the Second Stress Stage**

| Interaction       | MC (%)          | TA (%)           | TSS (%)         | ASC (%)         | CAC (%)          | SSC (%)         | TPC (%)         |
|-------------------|-----------------|------------------|-----------------|-----------------|------------------|-----------------|-----------------|
| SOBS*Braw         | -1.08 c ± 0.23  | 10.65 bc ± 2.32  | -3.52 cd ± 1.20 | -10.52 l ± 0.89 | -10.99 ij ± 0.07 | -10.62 i ± 0.84 | -6.93 i ± 0.04  |
| SOBS*Yadgar       | -1.09 c ± 0.09  | 4.65 bcd ± 0.11  | -4.37 de ± 1.03 | 14.56 g ± 1.68  | 2.80 ef ± 0.68   | -4.54 g ± 2.10  | 5.97 gh ± 0.66  |
| SOBS*Raza Pashayi | -0.23 a ± 0.03  | -5.94 ef ± 5.88  | -1.09 c ± 1.89  | 26.62 d ± 0.45  | 2.41 f ± 0.96    | 4.73 d ± 0.56   | 30.52 a ± 0.84  |
| SOBS*Sandra       | -0.22 a ± 0.13  | 4.44 cd ± 7.70   | 2.63 a ± 2.63   | 38.21 a ± 0.48  | 5.68 ab ± 0.01   | 17.14 a ± 0.11  | 19.30 c ± 0.42  |
| SOES*Braw         | -0.95 c ± 0.23  | 8.49 bcd ± 0.15  | -3.52 cd ± 1.20 | -7.97 k ± 1.43  | -10.57 i ± 0.36  | -8.82 h ± 0.05  | -8.00 ij ± 0.11 |
| SOES*Yadgar       | -0.86 c ± 0.11  | 4.72 bcd ± 4.76  | -6.25 ef ± 1.12 | 20.14 f ± 2.97  | -8.92 h ± 0.44   | -2.02 f ± 2.01  | 7.58 fg ± 0.60  |
| SOES*Raza Pashayi | -0.20 a ± 0.05  | -9.04 f ± 2.76   | -1.65 cd ± 1.64 | 30.34 c ± 1.90  | 3.87 cd ± 0.29   | 5.11 d ± 0.64   | 29.11 a ± 1.01  |
| SOES*Sandra       | -0.19 a ± 0.09  | 4.31 cd ± 3.73   | 1.75 ab ± 1.52  | 31.45 bc ± 0.79 | 6.02 a ± 0.35    | 16.67 a ± 0.40  | 16.77 d ± 0.31  |
| SOS*Braw          | -1.45 d ± 0.20  | 12.75 bc ± 0.24  | -7.03 fg ± 1.13 | -11.54 l ± 0.88 | -13.53 k ± 0.51  | -14.49 j ± 0.17 | -8.16 ij ± 0.46 |
| SOS*Yadgar        | -1.06 c ± 0.11  | 4.72 bcd ± 4.76  | -9.38 gh ± 0.10 | 9.30 h ± 1.32   | -11.85 j ± 0.71  | -8.62 h ± 1.09  | 6.10 gh ± 0.27  |
| SOS*Raza Pashayi  | -0.54 b ± 0.06  | 0.00 de ± 0.00   | -2.20 cd ± 1.91 | 22.93 e ± 2.30  | 1.78 f ± 0.32    | 2.63 e ± 0.30   | 23.57 b ± 1.05  |
| SOS*Sandra        | -0.43 ab ± 0.15 | 6.53 bcd ± 6.67  | 1.75 ab ± 1.52  | 32.91 b ± 0.43  | 4.82 bc ± 0.16   | 9.62 b ± 0.92   | 15.99 d ± 0.09  |
| SS*Braw           | -2.29 e ± 0.18  | 27.61 a ± 1.58   | -10.55 h ± 2.00 | -14.60 m ± 0.51 | -17.12 l ± 1.37  | -27.71 k ± 0.93 | -9.00 j ± 3.64  |
| SS*Yadgar         | -1.56 d ± 0.15  | 14.03 b ± 4.98   | -11.88 h ± 1.15 | -2.17 j ± 0.33  | -17.71 l ± 0.60  | -11.38 i ± 0.93 | 5.05 h ± 0.00   |
| SS*Raza Pashayi   | -0.60 b ± 0.11  | 0.12 de ± 6.07   | -2.77 cd ± 0.93 | 18.99 f ± 0.64  | 0.11 g ± 0.73    | -1.55 f ± 0.00  | 13.98 e ± 0.50  |
| SS*Sandra         | -0.48 b ± 0.08  | 8.75 bcd ± 10.23 | -0.85 bc ± 1.48 | 6.95 i ± 0.35   | 3.53 de ± 0.26   | 7.24 c ± 0.14   | 8.68 f ± 0.07   |

**Increasing and Decreasing Percentages Compared to Irrigated Plants during the First and Second Stress Stages**

| Interaction       | MC (%)          | TA (%)         | TSS (%)          | ASC (%)         | CAC (%)         | SSC (%)         | TPC (%)        |
|-------------------|-----------------|----------------|------------------|-----------------|-----------------|-----------------|----------------|
| SOBS*Braw         | -1.64 fg ± 0.32 | 10.59 c ± 1.94 | -5.63 def ± 1.19 | -12.73 j ± 0.02 | -11.42 g ± 0.07 | -12.15 g ± 0.38 | -9.85 k ± 0.22 |
| SOBS*Yadgar       | -1.16 de ± 0.09 | 9.38 c ± 4.87  | -9.38 gh ± 1.89  | 12.40 e ± 1.97  | -12.25 g ± 1.02 | -9.10 f ± 1.56  | 5.78 i ± 0.34  |
| SOBS*Raza Pashayi | -0.23 a ± 0.06  | 0.12 d ± 6.07  | -2.20 bc ± 1.91  | 25.47 b ± 0.70  | 3.87 c ± 0.34   | 3.49 c ± 0.24   | 26.29 b ± 0.83 |
| SOBS*Sandra       | -0.57 ab ± 0.10 | 6.53 cd ± 6.67 | 1.75 a ± 1.52    | 25.78 b ± 0.87  | 9.47 a ± 0.53   | 11.81 a ± 0.84  | 14.25 e ± 0.39 |

|                      |                  |                 |                  |                 |                 |                 |                 |
|----------------------|------------------|-----------------|------------------|-----------------|-----------------|-----------------|-----------------|
| SOES*Braw            | -1.61 fg ± 0.58  | 10.71 c ± 6.58  | -7.02 efg ± 3.13 | -10.35 i ± 0.73 | -13.96 h ± 0.51 | -13.05 g ± 0.74 | -10.31 k ± 0.07 |
| SOES*Yadgar          | -1.02 cde ± 0.08 | 11.67 c ± 2.60  | -8.75 fgh ± 1.04 | 5.57 g ± 0.57   | -14.65 h ± 0.21 | -7.78 f ± 1.46  | 9.06 g ± 0.05   |
| SOES*Raza<br>Pashayi | -0.25 a ± 0.04   | 0.00 d ± 0.00   | -2.20 bc ± 1.91  | 28.71 a ± 1.19  | 0.74 d ± 0.74   | 3.10 c ± 1.09   | 27.20 a ± 0.15  |
| SOES*Sandra          | -0.55 ab ± 0.11  | 6.39 cd ± 0.24  | 0.90 ab ± 3.00   | 28.52 a ± 0.31  | 7.40 b ± 0.01   | 10.95 a ± 0.36  | 15.73 d ± 0.09  |
| SOS*Braw             | -2.31 h ± 0.31   | 14.96 bc ± 6.67 | -9.84 ghi ± 2.30 | -19.86 k ± 0.27 | -16.91 i ± 0.11 | -19.25 i ± 0.98 | -10.37 k ± 0.45 |
| SOS*Yadgar           | -1.27 ef ± 0.16  | 14.03 bc ± 4.98 | -11.25 hi ± 0.12 | 5.88 g ± 0.87   | -16.51 i ± 0.73 | -11.98 g ± 1.04 | 6.44 h ± 0.60   |
| SOS*Raza<br>Pashayi  | -0.57 ab ± 0.05  | 6.19 cd ± 6.25  | -3.32 cd ± 1.61  | 19.67 d ± 0.98  | -0.63 e ± 0.62  | -0.70 d ± 0.39  | 20.49 c ± 0.69  |
| SOS*Sandra           | -0.68 bc ± 0.13  | 10.69 c ± 3.87  | 0.88 ab ± 1.52   | 22.49 c ± 0.59  | 6.37 b ± 0.70   | 6.29 b ± 0.80   | 14.04 e ± 0.29  |
| SS*Braw              | -3.00 i ± 0.40   | 34.02 a ± 0.68  | -12.68 ij ± 0.15 | -25.64 l ± 0.47 | -22.41 k ± 1.13 | -31.05 j ± 0.10 | -15.03 l ± 0.56 |
| SS*Yadgar            | -1.79 g ± 0.14   | 20.97 b ± 2.81  | -15.00 j ± 0.16  | -4.02 h ± 1.51  | -19.31 j ± 0.06 | -15.82 h ± 0.51 | 4.31 j ± 0.06   |
| SS*Raza<br>Pashayi   | -0.64 abc ± 0.08 | 6.19 cd ± 6.25  | -3.88 cde ± 0.90 | 9.26 f ± 0.09   | -3.24 f ± 1.13  | -4.57 e ± 0.53  | 11.14 f ± 0.08  |
| SS*Sandra            | -0.78 bcd ± 0.16 | 15.00 bc ± 4.33 | -2.59 cd ± 2.56  | 5.49 g ± 1.11   | 4.56 c ± 0.27   | 2.19 c ± 1.06   | 6.71 h ± 0.22   |

MC: moisture content, TA: titratable acidity, TSS: total soluble solids, ASC: ascorbic acid content, CAC: carotenoid content, SSC: soluble sugar content, TPC: total phenolics content, SS: stressed plants, SOS: stressed plants + oak leaf powder, SOES: stressed plants + oak leaf powder + oak leaf extract, SOBS: stressed plants + oak leaf powder + biofertilizers. Duncan's multiple range test at  $p \leq 0.05$  indicates that any values sharing the same letter in the same column are not statistically significant. The trait index  $\pm$  standard deviation (SD) is used to denote the values.

**Table S6.** Interaction effects of tomato genotypes and treatments on the different biochemical traits under the first, second, and their combination of stress stages.

| First Stress Stage  |                          |                           |                           |                          |                            |                                                |                                                |
|---------------------|--------------------------|---------------------------|---------------------------|--------------------------|----------------------------|------------------------------------------------|------------------------------------------------|
| Interaction         | PC (μg g <sup>-1</sup> ) | SSC (μg g <sup>-1</sup> ) | TPC (μg g <sup>-1</sup> ) | AC (μg g <sup>-1</sup> ) | LP (nmol g <sup>-1</sup> ) | GPA (units min <sup>-1</sup> g <sup>-1</sup> ) | CAT (units min <sup>-1</sup> g <sup>-1</sup> ) |
| SOBS*Braw           | 1527.08 g ±              | 583.70 g ±                | 465.13 d ±                | 1101.08 d ±              | 8.22 j ± 0.00              | 0.24 f ±                                       | 155.84 de ±                                    |
|                     | 16.15                    | 2.47                      | 1.12                      | 2.03                     |                            | 0.00                                           | 12.99                                          |
| SOBS*Yadgar         | 1078.36 k ±              | 413.64 l ±                | 272.81 n ±                | 749.05 q ±               | 9.14 i ± 0.04              | 0.18 g ±                                       | 71.43 gh ±                                     |
|                     | 1.79                     | 0.93                      | 0.56                      | 2.70                     |                            | 0.01                                           | 6.49                                           |
| SOBS*Raza Pashayi   | 1247.08 h ±              | 609.32 e ±                | 502.96 b ±                | 997.03 i ±               | 6.80 n ±                   | 0.29 de ±                                      | 175.32 bc ±                                    |
|                     | 8.97                     | 2.78                      | 11.61                     | 2.03                     |                            | 0.06                                           | 6.49                                           |
| SOBS*Sandra         | 2332.97 b ±              | 669.51 c ±                | 494.72 c ±                | 1193.65 a ±              | 9.66 h ±                   | 0.33 c ±                                       | 155.84 de ±                                    |
|                     | 7.18                     | 1.85                      | 1.50                      | 1.35                     |                            | 0.00                                           | 0.00                                           |
| SOES*Braw           | 2004.51 e ±              | 577.22 h ±                | 429.55 e ±                | 1090.27 e ±              | 7.37 m ±                   | 0.27 e ±                                       | 162.34 cd ±                                    |
|                     | 16.15                    | 2.16                      | 1.87                      | 4.73                     |                            | 0.04                                           | 19.48                                          |
| SOES*Yadgar         | 2184.00 d ±              | 456.85 k ±                | 280.49 m ±                | 726.08 r ±               | 7.80 l ± 0.02              | 0.30 d ±                                       | 77.92 g ±                                      |
|                     | 12.56                    | 0.93                      | 1.12                      | 1.35                     |                            | 0.02                                           | 12.99                                          |
| SOES*Raza Pashayi   | 1191.44 i ±              | 711.79 a ±                | 518.13 a ±                | 1045.68 g ±              | 5.55 p ±                   | 0.38 b ±                                       | 220.78 a ±                                     |
|                     | 10.77                    | 0.93                      | 0.19                      | 0.68                     |                            | 0.02                                           | 12.99                                          |
| SOES*Sandra         | 2446.05 a ±              | 704.69 b ±                | 368.69 hi ±               | 1165.95 b ±              | 7.87 k ±                   | 0.42 a ±                                       | 181.82 b ±                                     |
|                     | 12.56                    | 0.00                      | 0.19                      | 0.68                     |                            | 0.02                                           | 12.99                                          |
| SOS*Braw            | 1044.26 l ±              | 478.46 i ±                | 368.13 hi ±               | 1068.65 f ±              | 11.52 e ±                  | 0.24 f ±                                       | 77.92 g ±                                      |
|                     | 10.77                    | 0.31                      | 0.75                      | 0.68                     |                            | 0.06                                           | 12.99                                          |
| SOS*Yadgar          | 782.21 q ±               | 396.67 m ±                | 252.58 o ±                | 699.73 s ±               | 13.73 c ±                  | 0.14 h ±                                       | 45.45 i ± 6.49                                 |
|                     | 3.59                     | 1.85                      | 0.56                      | 2.03                     |                            | 0.13                                           |                                                |
| SOS*Raza Pashayi    | 1141.18 j ±              | 588.95 f ±                | 395.09 f ±                | 971.35 l ±               | 7.74 l ± 0.00              | 0.36 bc ±                                      | 207.79 a ± 0.00                                |
|                     | 10.77                    | 0.31                      | 0.37                      | 3.38                     |                            | 0.01                                           |                                                |
| SOS*Sandra          | 2324.00 b ±              | 632.47 d ±                | 363.82 i ±                | 1127.43 c ±              | 11.19 f ±                  | 0.28 de ±                                      | 142.86 ef ±                                    |
|                     | 1.79                     | 0.62                      | 0.94                      | 2.70                     |                            | 0.02                                           |                                                |
| SS*Braw             | 1008.36 m ±              | 392.04 n ±                | 339.10 k ±                | 831.49 o ±               | 14.51 b ±                  | 0.10 ij ±                                      | 51.95 i ± 12.99                                |
|                     | 10.77                    | 2.16                      | 0.19                      | 0.00                     |                            | 0.02                                           |                                                |
| SS*Yadgar           | 918.62 o ±               | 301.60 o ±                | 236.85 p ±                | 777.43 p ±               | 15.63 a ±                  | 0.07 jk ±                                      | 38.96 i ± 12.99                                |
|                     | 17.95                    | 1.85                      | 1.31                      | 2.70                     |                            | 0.07                                           |                                                |
| SS*Raza Pashayi     | 1040.67 l ±              | 388.95 n ±                | 381.24 g ±                | 978.11 k ±               | 9.99 g ±                   | 0.27 e ±                                       | 129.87 f ±                                     |
|                     | 7.18                     | 0.93                      | 1.50                      | 0.68                     |                            | 0.04                                           |                                                |
| SS*Sandra           | 2262.97 c ±              | 586.17 fg ±               | 345.09 j ±                | 984.19 j ±               | 12.26 d ±                  | 0.22 f ±                                       | 129.87 f ±                                     |
|                     | 16.15                    | 3.09                      | 0.19                      | 2.70                     |                            | 0.02                                           |                                                |
| SW*Braw             | 679.90 r ±               | 464.88 j ±                | 366.25 i ±                | 1010.54 h ±              | 4.79 q ±                   | 0.12 hi ±                                      | 19.48 j ± 6.49                                 |
|                     | 16.15                    | 4.63                      | 0.37                      | 2.03                     |                            | 0.004                                          |                                                |
| SW*Yadgar           | 954.51 n ±               | 283.70 q ±                | 224.68 q ±                | 684.86 t ±               | 5.97 o ±                   | 0.12 hi ±                                      | 58.44 hi ± 6.49                                |
|                     | 3.59                     | 1.23                      | 0.75                      | 6.08                     |                            | 0.00                                           |                                                |
| SW*Raza Pashayi     | 845.03 p ±               | 289.57 p ±                | 371.69 h ±                | 944.32 m ±               | 4.24 r ±                   | 0.22 f ±                                       | 129.87 f ± 0.00                                |
|                     | 8.97                     | 1.54                      | 0.56                      | 3.38                     |                            | 0.04                                           |                                                |
| SW*Sandra           | 1738.87 f ±              | 458.40 k ±                | 286.29 l ±                | 933.51 n ±               | 5.95 o ±                   | 0.06 k ±                                       | 51.95 i ± 0.00                                 |
|                     | 12.56                    | 1.23                      | 0.56                      | 2.03                     |                            | 0.02                                           |                                                |
| Second Stress Stage |                          |                           |                           |                          |                            |                                                |                                                |
| Interaction         | PC (μg g <sup>-1</sup> ) | SSC (μg g <sup>-1</sup> ) | TPC (μg g <sup>-1</sup> ) | AC (μg g <sup>-1</sup> ) | LP (nmol g <sup>-1</sup> ) | GPA (units min <sup>-1</sup> g <sup>-1</sup> ) | CAT (units min <sup>-1</sup> g <sup>-1</sup> ) |
| SOBS*Braw           | 2000.92 f ±              | 883.40 a ±                | 404.27 e ±                | 896.35 j ±               | 11.45 d ±                  | 0.23 de ±                                      | 136.36 de ±                                    |
|                     | 1.79                     | 0.31                      | 0.19                      | 1.35                     |                            | 0.02                                           | 0.01                                           |
| SOBS*Yadgar         | 1963.23 g ±              | 586.48 m ±                | 432.17 b ±                | 851.08 m ±               | 10.84 f ±                  | 0.14 gh ±                                      | 84.42 hij ±                                    |
|                     | 10.77                    | 1.54                      | 0.37                      | 0.68                     |                            | 0.04                                           | 0.01                                           |
| SOBS*Raza Pashayi   | 1568.36 l ±              | 768.58 f ±                | 418.13 d ±                | 1066.62 f ±              | 9.42 i ± 0.09              | 0.33 b ±                                       | 123.38 ef ±                                    |
|                     | 3.59                     | 2.78                      | 1.69                      | 2.70                     |                            | 0.01                                           | 6.49                                           |
| SOBS*Sandra         | 2702.72 b ±              | 732.16 g ±                | 458.39 a ±                | 1130.14 b ±              | 7.98 l ± 0.02              | 0.28 c ±                                       | 162.34 bc ±                                    |
|                     | 17.95                    | 2.78                      | 0.75                      | 0.00                     |                            | 0.02                                           | 19.48                                          |
| SOES*Braw           | 3072.46 a ±              | 877.53 b ±                | 395.66 f ±                | 879.46 k ±               | 8.53 k ±                   | 0.28 c ±                                       | 168.83 b ±                                     |
|                     | 10.77                    | 2.47                      | 0.94                      | 0.68                     |                            | 0.02                                           | 0.00                                           |
| SOES*Yadgar         | 1905.79 h ±              | 643.89 k ±                | 359.89 i ±                | 776.08 p ±               | 10.56 g ±                  | 0.23 de ±                                      | 110.39 fg ±                                    |
|                     | 0.00                     | 0.93                      | 1.12                      | 0.00                     |                            | 0.06                                           | 0.01                                           |
| SOES*Raza Pashayi   | 2575.28 c ±              | 815.80 c ±                | 433.11 b ±                | 1090.27 d ±              | 7.34 o ±                   | 0.40 a ±                                       | 142.86 d ±                                     |
|                     | 12.56                    | 2.47                      | 1.69                      | 0.68                     |                            | 0.04                                           | 0.01                                           |
| SOES*Sandra         | 2582.46 c ±              | 794.51 e ±                | 422.06 c ±                | 1151.89 a ±              | 6.23 r ±                   | 0.40 a ±                                       | 214.29 a ± 6.49                                |
|                     | 8.97                     | 2.16                      | 1.12                      | 1.22                     |                            | 0.04                                           |                                                |
| SOS*Braw            | 1539.64 m ±              | 809.32 d ±                | 365.88 h ±                | 836.22 n ±               | 12.41 c ±                  | 0.19 f ±                                       | 116.88 f ±                                     |
|                     | 0.00                     | 3.40                      | 0.75                      | 0.68                     |                            | 0.02                                           | 12.99                                          |



| SOS*Yadgar                     | 1756.82 i ± 8.97         | 415.80 p ± 1.23           | 329.93 l ± 0.37           | 699.73 s ± 3.38          | 10.99 e ± 0.07             | 0.16 g ± 0.01                                  | 90.91 hi ± 0.00                                |
|--------------------------------|--------------------------|---------------------------|---------------------------|--------------------------|----------------------------|------------------------------------------------|------------------------------------------------|
| SOS*Raza Pashayi               | 1509.13 n ± 5.38         | 631.54 l ± 1.54           | 402.96 e ± 1.12           | 982.16 h ± 2.03          | 10.03 h ± 0.04             | 0.31 b ± 0.01                                  | 97.40 gh ± 6.49                                |
| SOS*Sandra                     | 2449.64 d ± 16.15        | 654.38 j ± 2.78           | 417.19 d ± 0.75           | 1118.65 c ± 0.68         | 8.96 j ± 0.04              | 0.25 d ± 0.01                                  | 149.35 cd ± 6.49                               |
| SS*Braw                        | 1150.15 q ± 1.79         | 688.95 i ± 0.93           | 354.64 j ± 1.87           | 857.84 l ± 2.03          | 13.94 b ± 0.04             | 0.11 i ± 0.02                                  | 64.94 k ± 12.99                                |
| SS*Yadgar                      | 1643.74 k ± 10.77        | 385.56 r ± 1.85           | 213.07 p ± 1.12           | 716.62 r ± 2.03          | 16.63 a ± 0.07             | 0.13 hi ± 0.02                                 | 77.92 ijk ± 12.99                              |
| SS*Raza Pashayi                | 1385.28 o ± 7.18         | 453.77 o ± 2.16           | 327.49 m ± 0.56           | 953.78 i ± 4.37          | 11.43 d ± 0.00             | 0.28 c ± 0.02                                  | 84.42 hij ± 6.49                               |
| SS*Sandra                      | 2288.10 e ± 1.79         | 587.72 m ± 0.93           | 394.85 f ± 0.62           | 1081.35 e ± 2.57         | 9.35 i ± 0.06              | 0.16 g ± 0.01                                  | 97.40 gh ± 6.49                                |
| SW*Braw                        | 342.46 s ± 8.97          | 718.58 h ± 0.31           | 347.53 k ± 0.37           | 824.73 o ± 1.35          | 7.54 n ± 0.02              | 0.12 hi ± 0.01                                 | 45.45 l ± 6.49                                 |
| SW*Yadgar                      | 1729.90 j ± 7.18         | 402.53 q ± 2.16           | 300.52 o ± 1.31           | 767.30 q ± 2.03          | 7.71 m ± 0.04              | 0.20 ef ± 0.01                                 | 123.38 ef ± 6.49                               |
| SW*Raza Pashayi                | 1064.00 r ± 8.97         | 360.86 s ± 5.56           | 311.95 n ± 2.25           | 957.16 i ± 2.70          | 6.43 q ± 0.02              | 0.24 d ± 0.02                                  | 71.43 jk ± 6.49                                |
| SW*Sandra                      | 1369.13 p ± 16.15        | 525.06 n ± 0.00           | 379.36 g ± 0.00           | 1032.84 g ± 2.70         | 7.13 p ± 0.06              | 0.05 j ± 0.01                                  | 19.48 m ± 6.49                                 |
| First and Second Stress Stages |                          |                           |                           |                          |                            |                                                |                                                |
| Interaction                    | PC (µg g <sup>-1</sup> ) | SSC (µg g <sup>-1</sup> ) | TPC (µg g <sup>-1</sup> ) | AC (µg g <sup>-1</sup> ) | LP (nmol g <sup>-1</sup> ) | GPA (units min <sup>-1</sup> g <sup>-1</sup> ) | CAT (units min <sup>-1</sup> g <sup>-1</sup> ) |
| SOBS*Braw                      | 1801.69 h ± 10.77        | 832.72 d ± 0.25           | 534.98 c ± 0.62           | 1103.11 bc ± 4.05        | 11.89 e ± 0.06             | 0.18 h ± 0.01                                  | 110.39 ghi ± 6.49                              |
| SOBS*Yadgar                    | 1579.13 k ± 3.59         | 569.51 n ± 0.62           | 389.29 k ± 0.94           | 886.89 hi ± 1.35         | 11.35 f ± 0.07             | 0.23 fg ± 0.01                                 | 129.87 fg ± 12.99                              |
| SOBS*Raza Pashayi              | 2415.54 b ± 7.18         | 871.67 c ± 0.93           | 471.50 d ± 1.12           | 1008.51 def ± 1.35       | 10.34 h ± 0.09             | 0.41 c ± 0.04                                  | 123.38 gh ± 19.48                              |
| SOBS*Sandra                    | 2431.69 b ± 8.97         | 784.63 f ± 2.16           | 416.82 h ± 0.37           | 1118.65 bc ± 6.08        | 9.11 l ± 0.04              | 0.40 c ± 0.01                                  | 259.74 b ± 0.00                                |
| SOES*Braw                      | 2216.31 e ± 12.56        | 892.65 b ± 1.54           | 636.29 a ± 1.12           | 1199.73 a ± 2.03         | 10.16 i ± 0.06             | 0.25 f ± 0.01                                  | 149.35 ef ± 6.49                               |
| SOES*Yadgar                    | 1715.54 i ± 10.77        | 723.52 g ± 2.16           | 336.10 o ± 1.31           | 900.41 gh ± 2.70         | 9.94 j ± 0.02              | 0.28 e ± 0.02                                  | 162.34 de ± 19.48                              |
| SOES*Raza Pashayi              | 2571.69 a ± 16.15        | 833.40 d ± 2.16           | 571.50 b ± 1.12           | 1106.49 bc ± 3.38        | 7.37 p ± 0.00              | 0.61 a ± 0.01                                  | 194.81 c ± 12.99                               |
| SOES*Sandra                    | 2367.08 c ± 8.97         | 976.60 a ± 0.93           | 430.86 g ± 0.56           | 1163.24 ab ± 0.68        | 8.28 m ± 0.06              | 0.62 a ± 0.02                                  | 363.64 a ± 0.00                                |
| SOS*Braw                       | 1035.28 q ± 5.38         | 816.11 e ± 0.93           | 446.40 f ± 1.50           | 830.81 ijk ± 0.68        | 16.09 c ± 0.02             | 0.20 gh ± 0.01                                 | 123.38 gh ± 6.49                               |
| SOS*Yadgar                     | 1555.79 l ± 8.97         | 524.44 o ± 0.62           | 316.44 q ± 1.12           | 869.32 hij ± 1.35        | 13.77 d ± 0.02             | 0.22 fgh ± 0.02                                | 129.87 fg ± 12.99                              |
| SOS*Raza Pashayi               | 1853.74 g ± 30.51        | 641.11 k ± 1.85           | 462.88 e ± 0.75           | 993.65 ef ± 0.00         | 10.41 h ± 0.02             | 0.44 b ± 0.01                                  | 168.83 d ± 12.99                               |
| SOS*Sandra                     | 2315.03 d ± 7.18         | 699.75 j ± 0.62           | 406.14 i ± 0.19           | 1060.54 cd ± 0.68        | 9.84 k ± 0.04              | 0.22 fgh ± 0.00                                | 129.87 fg ± 0.00                               |
| SS*Braw                        | 1518.10 m ± 7.18         | 709.63 i ± 0.62           | 331.42 p ± 1.50           | 818.45 jk ± 4.53         | 16.74 a ± 0.07             | 0.11 i ± 0.02                                  | 90.91 ij ± 12.99                               |
| SS*Yadgar                      | 1422.97 n ± 5.38         | 391.73 q ± 1.85           | 195.28 t ± 2.06           | 823.60 ijk ± 162.84      | 16.46 b ± 0.06             | 0.10 i ± 0.01                                  | 77.92 jk ± 12.99                               |
| SS*Raza Pashayi                | 1613.23 j ± 16.15        | 587.10 m ± 1.54           | 343.60 n ± 0.19           | 951.08 fg ± 0.68         | 11.93 e ± 0.02             | 0.31 d ± 0.01                                  | 103.90 hi ± 0.00                               |
| SS*Sandra                      | 2090.67 f ± 16.15        | 634.32 l ± 2.47           | 393.97 j ± 1.12           | 1036.22 de ± 0.68        | 10.69 g ± 0.00             | 0.18 h ± 0.03                                  | 110.39 ghi ± 19.48                             |
| SW*Braw                        | 342.46 r ± 8.97          | 718.58 h ± 0.31           | 347.53 m ± 0.37           | 824.73 ijk ± 1.35        | 7.54 o ± 0.02              | 0.12 i ± 0.01                                  | 45.45 l ± 6.49                                 |
| SW*Yadgar                      | 1729.90 i ± 7.18         | 402.53 p ± 2.16           | 300.52 s ± 1.31           | 767.30 k ± 2.03          | 7.71 n ± 0.04              | 0.20 gh ± 0.01                                 | 123.38 gh ± 6.49                               |
| SW*Raza Pashayi                | 1064.00 p ± 8.97         | 360.86 r ± 5.56           | 311.95 r ± 2.25           | 957.16 fg ± 2.70         | 6.43 r ± 0.02              | 0.24 fg ± 0.02                                 | 71.43 k ± 6.49                                 |
| SW*Sandra                      | 1369.13 o ± 16.15        | 525.06 o ± 0.00           | 379.36 l ± 0.00           | 1032.84 de ± 2.70        | 7.13 q ± 0.06              | 0.05 j ± 0.01                                  | 19.48 m ± 6.49                                 |

PC: proline content, SSC: soluble sugar content, TPC: total phenolic content, AC: antioxidant activity, LP: lipid peroxidation, GPA: peroxidase, CAT: catalase, SS: stressed plants, SOS: stressed plants + oak leaf powder, SOES: stressed plants + oak leaf powder + oak leaf extract, SOBS: stressed plants + oak leaf powder + biofertilizers. Duncan's multiple range test at  $p \leq 0.05$  indicates that any mean values sharing the same letter in the same column are not statistically significant. The mean  $\pm$  standard deviation (SD) is used to represent the values.

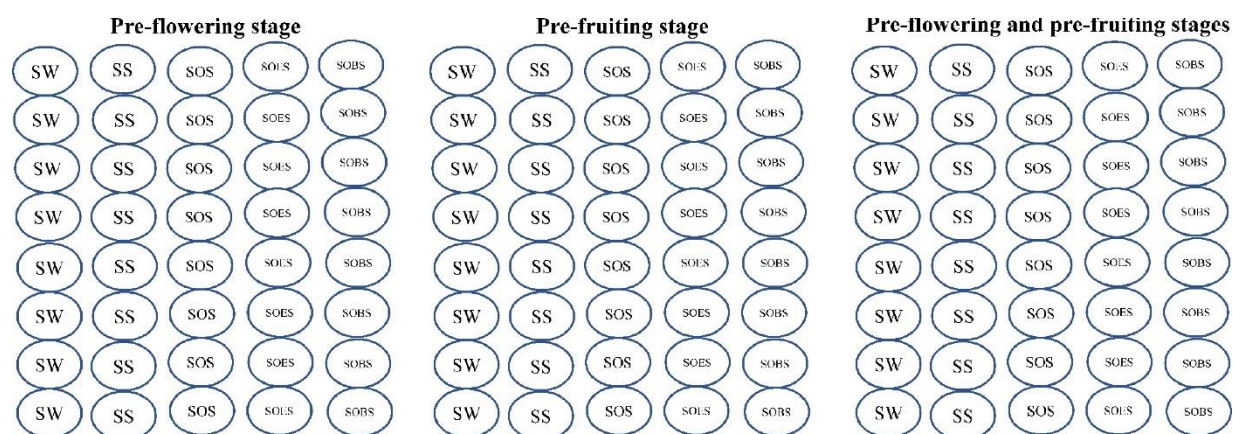

**Figure S1.** Experimental design layout of the variables investigated in this study for each genotype. SW: irrigated plants (control), SS: stressed plants, SOS: stressed plants + oak leaf powder, SOES: stressed plants + oak leaf powder + oak leaf extract, SOBS: stressed plants + oak leaf powder + biofertilizers. Each circle represents a pot or replication.

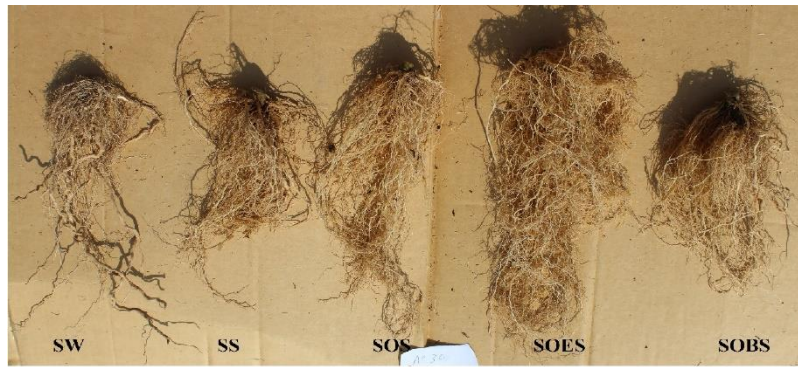

**First stress stage**

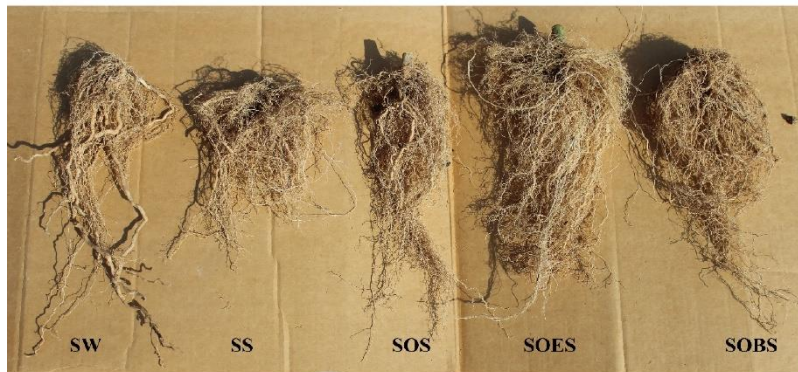

**Second stress stage**

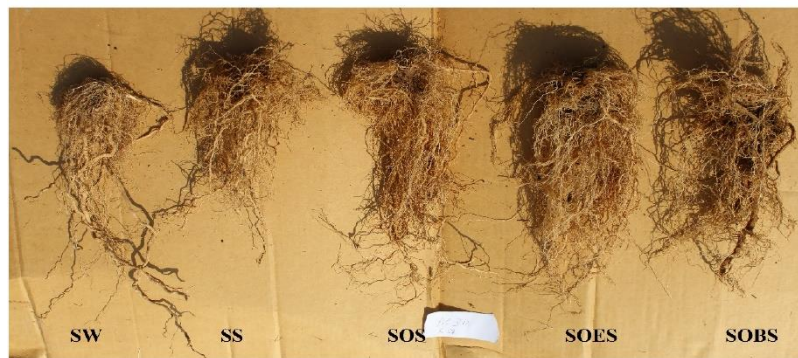

**First and second stress stages**

**Figure S2.** Effect of different treatments on the root morphology of the Yadgar genotype under different stress conditions. SW: irrigated plants (control), SS: stressed plants, SOS: stressed plants + oak leaf powder, SOES: stressed plants + oak leaf powder + oak leaf extract, SOBS: stressed plants + oak leaf powder + biofertilizers.

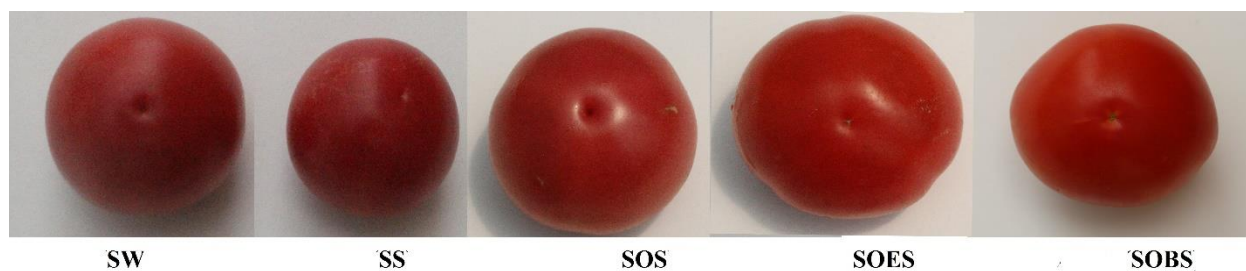

**Figure S3.** Effect of different treatments on the fruit morphology of the Raza Pashayi genotype under first stress conditions. SW: irrigated plants (control), SS: stressed plants, SOS: stressed plants + oak leaf powder, SOES: stressed plants + oak leaf powder + oak leaf extract, SOBS: stressed plants + oak leaf powder + biofertilizers.
